# Supplementary material
Source: PubMed Central journal article supplement (PMC7773407)

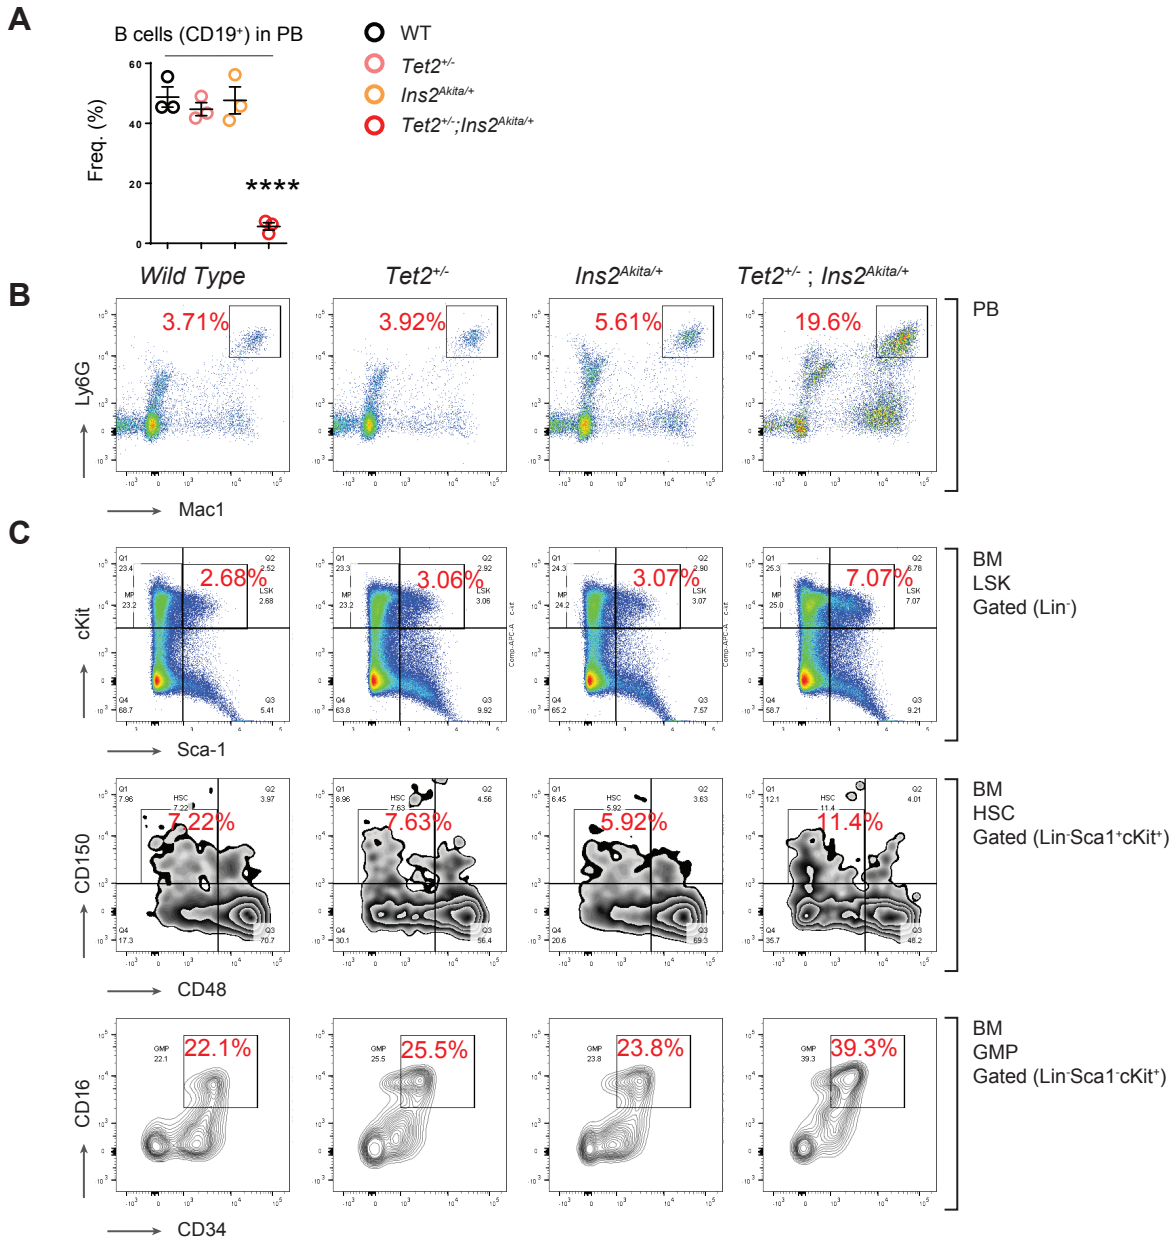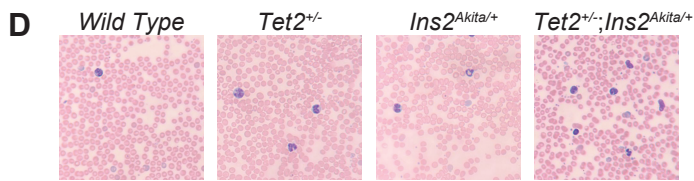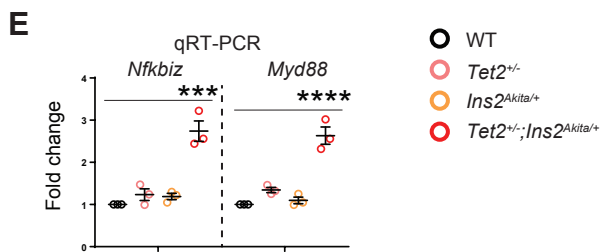

Supplement: jci-131-140707-s373.pdf [file jci-131-140707-s373.pdf]
